# 1 Female mate choice is a reproductive isolating barrier in 2 *Heliconius* butterflies

3 Laura Southcott<sup>1,2</sup> and Marcus R. Kronforst<sup>2,3</sup>

<sup>1</sup>southcott@uchicago.edu

<sup>2</sup>Committee on Evolutionary Biology, University of Chicago, Chicago, IL

<sup>3</sup> Department of Ecology and Evolution, University of Chicago, Chicago, IL

4 December 8, 2017

## 5 **Abstract**

6 In sexually reproducing organisms, speciation involves the evolution of reproductive  
7 isolating mechanisms that decrease gene flow. Premating reproductive isolation, often  
8 the result of mate choice, is a major obstacle to gene flow between species because  
9 it acts earlier in the life cycle than other isolating barriers. While female choice is  
10 often considered the default mode in animal species, research in the butterfly genus  
11 *Heliconius*, a frequent subject of speciation studies, has focused on male mate choice.  
12 We studied mate choice by *H. cydno* females by pairing them with either conspecific  
13 males or males of the closely related species *H. pachinus*. Significantly more intraspecific  
14 trials than interspecific trials resulted in mating. Because male courtship rates did not  
15 differ between the species when we excluded males that never courted, we attribute  
16 this difference to female choice. Females also performed more acceptance behaviours  
17 towards conspecific males. Premating isolation between these two species thus entails  
18 both male and female mate choice, and female choice may be an important factor in  
19 the origin of butterfly species.

20 keywords: speciation, mate choice, behavioural isolation

## 21 **Introduction**

22 Speciation has produced the astounding variety of organisms that so fascinate biologists. In  
23 sexually reproducing organisms, speciation is the evolution of barriers to gene flow, creating  
24 independent lineages out of previously connected populations (Coyne and Orr 2004). Of the  
25 many barriers that can prevent interbreeding, those that occur prior to mating can exert  
26 a relatively large influence on total reproductive isolation: though hybrids may be sterile,  
27 strong premating isolation prevents them from being formed at all (Schemske 2000; Ramsey  
28 et al. 2003). Premating barriers are especially important in cases of secondary contact or  
29 speciation with gene flow (Abbott et al. 2013).

30 In insects, many mechanisms can cause premating isolation: *Rhagoletis* flies mate on their  
31 host plants, so host plant preferences are a substantial barrier to hybridization (Powell et al.  
32 2012). Many damselfly species differ in genital shape, and a lack of “fit” between species  
33 prevents successful mating (McPeck et al. 2011). Songs of male *Laupala* crickets match the  
34 preferences of conspecific females (Wiley and Shaw 2010). Female, and sometimes male,  
35 preference underlies behavioural isolation between many pairs of *Drosophila* species (e.g.  
36 Coyne and Orr 1989; Noor 1995; Jennings et al. 2014), and these preferences can even be  
37 learned (Dukas and Scott 2015).

38 The genus *Heliconius*, containing about 45 species of Neotropical butterflies, has featured  
39 prominently in speciation research over the past three decades. *Heliconius* butterflies iden-  
40 tify the correct species of mate based on several cues, especially wing colour pattern (Jiggins  
41 et al. 2001; Kronforst et al. 2006b; Merrill et al. 2014). Interspecific matings produce hybrid  
42 offspring that may be sterile or more vulnerable to predators because they do not match  
43 either aposematic parental species (Naisbit et al. 2002; Merrill et al. 2012). Unlike in many  
44 taxa, male choice has been much more commonly studied than female choice in *Heliconius*,  
45 and female choice studies have only documented mate preference for variation (natural or  
46 experimentally-induced) in conspecific males (Finkbeiner et al. 2017; Chouteau et al. 2017;  
47 Darragh et al. 2017). However, males still regularly court heterospecific females when they  
48 have the opportunity (Merrill et al. 2011a). Therefore, female choice could facilitate specia-  
49 tion within the genus. The traditional focus on male mate preference in *Heliconius* research  
50 may mean we are missing a piece of the puzzle in understanding the origin and maintenance  
51 of species in this genus. Here we present an experiment to determine whether female *H.*  
52 *cydno* prefer males of their own species to males of the closely related *H. pachinus* (Figure  
53 1).

## 54 Methods

### 55 Butterflies

56 *Heliconius cydno galanthus* occurs on the Caribbean coast of Central America from western  
57 Panama to southern Mexico. *Heliconius pachinus* is restricted to the Pacific coast of Costa  
58 Rica and Panama (Rosser et al. 2012). The two species diverged approximately 430,000 years  
59 ago (Kronforst et al. 2013). There is ongoing gene flow primarily from *H. pachinus* into *H.*  
60 *cydno* (Kronforst et al. 2013, 2006a), and hybridization is probably most prevalent around  
61 San Jose, Costa Rica, where butterflies can cross the central mountain range through a lower  
62 elevation plateau (Kronforst et al. 2007).

63 The butterflies used in our experiments came from captive populations we established  
64 and maintained at the Smithsonian Tropical Research Institute’s insectaries in Gamboa,  
65 Panama. The captive *H. cydno* population was founded with approximately 15 wild individ-  
66 uals from Turrialba, Costa Rica in September 2015. The *H. pachinus* population came from  
67 eight butterflies from Reserva Forestal El Montuoso, Herrera, Panama caught in February  
68 2016, with 15 additional wild-caught butterflies added in April 2017. Experiments took place

69 between May 2016 and August 2017.

70 Adult butterflies were kept in 2.8 x 2.7 x 1.8 m cages separated by species and sex and  
71 provided with a sugar-water solution and flowers of *Lantana camara*, *Psychotria poeppi-*  
72 *giana*, *Gurania eriantha*, *Psiguria triphylla*, and/or *Psiguria warscewiczii* daily as a pollen  
73 source. Caterpillars of both species were raised on *Passiflora triloba* and *P. edulis* plants  
74 until pupation.

## 75 **Mate choice experiment**

76 To test whether naive virgin female *H. cydno* prefer to mate with conspecifics, we conducted  
77 a no-choice experiment in which a female was paired with either a *H. cydno* or a *H. pachinus*  
78 male and thus given the opportunity to mate or not.

79 We painted females' wings yellow to increase the probability of *H. pachinus* males ap-  
80 proaching them. Kronforst et al. (2006b) found that *H. pachinus* males were as likely to  
81 approach wings of *H. cydno* females from a line that had a yellow forewing band intro-  
82 gressed from *H. melpomene* as they were to approach wings of *H. pachinus* females. We  
83 chose the simpler method of painting the forewing band to avoid the potential effects of  
84 inbreeding and *H. melpomene* genetics on female behaviour. On the day of their emergence  
85 and after their wings had fully dried, we used a Copic YG21 Anise paint pen on the dorsal  
86 surface of the forewing. This paint dries rapidly and females can fly normally within seconds  
87 of its application. Females to be paired with *H. pachinus* males had their white forewing  
88 band painted yellow, while females to be paired with *H. cydno* males had paint applied to  
89 the black part of the forewing (approximately equal area to the white band) as a control.  
90 Spectrophotometry indicated that painting over the black part of the wing did not substan-  
91 tially change its reflectance spectrum, while the yellow paint on the white band was a close  
92 approximation of the yellow pigment of *H. pachinus* and other *Heliconius* species (Figure  
93 S1). A pilot study found no difference in survival or activity levels between painted and  
94 unpainted females.

95 Experimental females were housed overnight in a large cage with other virgin females.  
96 Females were tested either one or two days after emergence, when they are most receptive  
97 to mating and when mating typically takes place in the wild (Jiggins 2016). A stimulus  
98 male - either *H. cydno* or *H. pachinus* at least 10 days post-emergence - was isolated in  
99 the experimental cage the day before the experiment. On the day of the experiment, the  
100 female was placed in a popup cage (30 x 30 x 30 cm) in the experimental cage for 5 minutes  
101 to acclimate. The female was then released, and both the male's courtship attempts and  
102 the female's responses were recorded until mating occurred or for up to 2 hours. Table 1  
103 describes the male and female behaviours recorded. Behaviours were recorded every minute,  
104 so repeated instances of the same behaviour during the same minute were not counted. Each  
105 female and each male was used in only one experiment to ensure independence of trials.

Table 1: Behaviours recorded during no-choice experiment

| Behaviour    | Description                                                                                                       |
|--------------|-------------------------------------------------------------------------------------------------------------------|
| Males        |                                                                                                                   |
| Chase        | Male follows female closely while both are flying                                                                 |
| Court        | Male hovers over perched female                                                                                   |
| Mate attempt | Male lands next to female and bends abdomen towards hers                                                          |
| Females      |                                                                                                                   |
| Open wings   | Perched female opens wings and holds them there                                                                   |
| Flutter      | Perched female rapidly opens and closes wings while lifting abdomen and, usually, exposing abdominal scent glands |
| Close wings  | Perched female holds wings closed                                                                                 |
| Fly          | Female flies away from male (including taking off from a perched position)                                        |

## 106 Statistical analysis

107 We tested whether interspecific or intraspecific pairs mated more often with a chi-squared  
108 test with Yates' continuity correction. The outcome of a no-choice trial could be attributed  
109 to male choice, female choice, or both. We tested whether males of the two species courted  
110 females equally often with a Mann-Whitney U test, excluding trials in which the male never  
111 courted. To confirm that male courtship rate did not predict the outcome of the trial, we  
112 conducted a logistic regression (GLM with a logit link function) with male species and  
113 number of courtships as independent variables. We examined whether females' behaviours  
114 per male courtship predicted the outcome of the experiments using logistic regression on  
115 only the data from intraspecific trials (there were not enough interspecific matings to test  
116 whether male species interacted with these behaviours). Finally, we tested whether female  
117 behaviour rates differed between inter- and intraspecific trials using Mann-Whitney U tests  
118 to determine whether females responded differently to different species of males. All analyses  
119 were performed in R (R Core Team 2013).

## 120 Results

121 Intraspecific pairs mated significantly more often than interspecific pairs (Table 2,  $\chi^2 =$   
122 9.28,  $df = 1$ ,  $p = 0.002$ ). *Heliconius pachinus* males were more likely to ignore the female  
123 altogether: we excluded 21 trials with *H. pachinus* males because they performed no courtship  
124 behaviours, compared to 5 such trials for *H. cydno*. We excluded trials in which the male  
125 never courted because there is no opportunity for females to exercise choice in this context.

126 Male *H. cydno* and *H. pachinus* courtship frequencies did not differ significantly ( $U =$   
127 338,  $p = 0.184$ ; Figure S2). In a logistic regression of outcome versus male species, number  
128 of courtships, and their interaction, the number of courtship attempts did not predict the  
129 outcome of the experiment (likelihood ratio tests of coefficients in a logistic regression: num-

130 ber of courtships  $p = 0.54$ ; interaction between male species and number of courtships  $p =$   
131  $0.57$ ). Furthermore, comparing the full model to a reduced model with only male species as  
132 predictor, the reduced model had lower AIC ( $\Delta\text{AIC} = 3.31$ ) and a likelihood ratio test found  
133 that adding number of courtships did not improve the model ( $p = 0.71$ ). Thus, we attribute  
134 the difference in mating rates to female preference for conspecific males rather than different  
135 intensity of male courtship once non-courting males were excluded.

136 The rates of wing opening and fluttering did not differ between interspecific and  
137 intraspecific trials. In intraspecific trials, “close wings” behaviour was positively correlated  
138 with the outcome of the experiment, suggesting that wing closing indicates female acceptance  
139 of a courting male (coefficient = 14.3, SE of coefficient = 5.1,  $p = 0.0088$ ). The other  
140 three behaviours were not significantly correlated with outcome, though all had negative  
141 coefficients and are considered rejection behaviours by other authors (Figure 2, Jiggins 2016;  
142 Chouteau et al. 2017). Females closed their wings more often in intraspecific trials and flew  
away from the male more often in interspecific trials (Table 3, Figure 3).

Table 2: Outcomes of no-choice experiment

|               | Mating | No Mating |
|---------------|--------|-----------|
| Interspecific | 4      | 21        |
| Intraspecific | 15     | 9         |

143

Table 3: Results of Mann-Whitney U tests comparing female behaviours per male courtship between trials with *H. cydno* (intraspecific) and *H. pachinus* (interspecific) males.

| Behaviour    | U     | p      |
|--------------|-------|--------|
| Closed wings | 369.5 | 0.001  |
| Open wings   | 239   | 0.56   |
| Flutter      | 200.5 | 0.12   |
| Fly          | 140.5 | 0.0087 |

## 144 Discussion

145 Intraspecific no-choice trials ended in mating much more often than interspecific trials did.  
146 The lack of difference in courtship rates between species among males who courted at least  
147 once strongly suggests that female choice determined the outcome. The differences in female  
148 response behaviours (closing wings and flying away) to different species of courting males  
149 further suggests that females actively chose mates. This is the first demonstration of inter-  
150 specific female choice in *Heliconius* butterflies, a model genus for speciation research with  
151 extensive evidence of male mate choice. Although male choice exists between these species  
152 (Kronforst et al. 2006b), it is weak enough that we could observe sufficient interspecific  
153 courtships to examine females’ response to heterospecific males.

154 Our study adds to other attempts to document female mate preference in *Heliconius*.  
155 Recent studies have revealed intraspecific female choice in several *Heliconius* species us-  
156 ing a variety of methods. All suggest that females exert choice during courtship based on  
157 multimodal signals, particularly vision and olfaction. In *H. erato*, females approach mov-  
158 ing paper wings more often when they are UV reflective and have the appropriate yellow  
159 pigment (Finkbeiner et al. 2017). In the polymorphic species *H. numata*, females perform  
160 more rejection behaviours towards moving models made of dead males' wings if those wings  
161 are of the same colour pattern morph as the female (Chouteau et al. 2017). In *H. timareta*,  
162 *H. erato*, and two subspecies of *H. melpomene*, females are less likely to mate with males  
163 whose pheromone-producing androconial scales have been blocked with nail varnish than  
164 with non-blocked males (Darragh et al. 2017). Backcross hybrid females between *H. cydno*  
165 and *H. melpomene* are less likely to mate when they are heterozygous at the locus controlling  
166 a colour pattern element on the hindwing than when homozygous (Merrill et al. 2011b). Be-  
167 cause both visual and olfactory cues differ among *Heliconius* species, these same cues could  
168 be used in interspecific female mate choice. *Heliconius cydno* and *H. pachinus*, however, do  
169 not differ in male pheromone composition (Schulz et al. 2007, K. Darragh pers. comm.), so  
170 females likely choose between these species based on visual and perhaps other non-olfactory  
171 cues.

172 Female choice acts within and between other butterfly species. In *Pieris occidentalis*,  
173 females prefer males of their own species over male *P. protodice*, and increasing the area of  
174 melanized spots on the forewing of *P. protodice* males increases the rate at which *P. occi-*  
175 *dentalis* mate with them (Wiernasz and Kingsolver 1992). A series of experiments revealed  
176 that *Colias philodice* females prefer conspecific males over *C. eurytheme* males, but that  
177 wing colour alone does not affect their preference (Silberglied and Taylor 1978). Females of  
178 the cryptic species *Leptidea sinapis* and *L. reali* use long courtships to distinguish between  
179 males, which court both species indiscriminately (Friberg et al. 2008). Other studies have  
180 not tested interspecific mate choice directly, but have manipulated conspecific male pheno-  
181 types. They include studies of eyespot morphology and pheromones in *Bicyclus anynana*  
182 (Robertson and Monteiro 2005; Costanzo and Monteiro 2007) and of ultraviolet reflectance,  
183 iridescence, and other visual cues in *Pieris rapae* (Morehouse and Rutowski 2010), *Battus*  
184 *philenor* (Rutowski and Rajyaguru 2013), and *Hypolimnas bolina* (Kemp 2007), among other  
185 species.

186 While female choice acts in both inter- and intraspecific contexts in many butterflies, it is  
187 not always clear how much such choice contributes to total reproductive isolation. In many  
188 species, mate choice is mutual, but it is also often sequential, with males choosing whether to  
189 approach a female before the female can choose to accept or reject a male. This is certainly  
190 the case in *Heliconius*, and has long complicated efforts to detect female choice (Merrill et al.  
191 2015). *Heliconius cydno* and *H. pachinus* are one of the younger species pairs within the genus  
192 (approximately 430 kya divergence; Kronforst et al. 2013). Compared to *H. cydno* and its  
193 next closest relative *H. melpomene*, which diverged approximately 1.4 mya (Kronforst et al.  
194 2013), male *H. cydno* and *H. pachinus* are more likely to engage in heterospecific courtships  
195 (Merrill et al. 2011a). This weaker male choice made it possible for us to induce *H. pachinus*



196 males to court *H. cydno* females in sufficient quantities to test female choice. However, it also  
197 suggests that later in speciation female choice may decrease in relative importance among  
198 isolating barriers because male choice is strong enough that females are seldom courted by  
199 heterospecific males. Nevertheless, in young species pairs such as the one we studied, mate  
200 choice by both sexes contributes to reproductive isolation.

201 We have demonstrated for the first time that interspecific female mate choice is a repro-  
202 ductive isolating barrier between two *Heliconius* species. This finding parallels recent research  
203 showing intraspecific female choice in several *Heliconius* species and fills a longstanding gap  
204 in the extensive literature on speciation and hybridization in this genus. Further research  
205 on the cues females use to select mates and whether they are linked to divergently selected  
206 traits is needed to understand the role of female choice in speciation.

## 207 Acknowledgments

208 We thank Owen McMillan and the staff of the Smithsonian Tropical Research Institute for  
209 allowing us to use the insectary facility. We also thank Oscar Paneso, Emma Tomaszewski,  
210 Aaron Goodman, Holly Black, Amber Antonison, Lina Melo, Diego Vergara, Chantelle Doyle,  
211 and Liz Evans for capable and enthusiastic assistance with rearing butterflies, maintaining  
212 the insectaries, and performing experiments, and the rest of the STRI Gamboa community  
213 for their logistical and emotional support. We are also grateful to Trevor Price, Jill Mateo,  
214 and Corrie Moreau for helpful comments on this manuscript. This research was funded by  
215 a Rosemary Grant award from the Society for the Study of Evolution, Center for Latin  
216 American Studies Tinker Field Research grant and Hinds Award from the University of  
217 Chicago, and Short-term Fellowship and CIC Graduate Fellowship from the Smithsonian  
218 to LS as well as a Pew Biomedical Scholars grant, NSF grant IOS-1452648, and NIH grant  
219 GM108626 to MRK.

## 220 References

- 221 Abbott, R., D. Albach, S. Ansell, J. W. Arntzen, S. J. Baird, N. Bierne, J. Boughman,  
222 A. Brelsford, C. A. Buerkle, R. Buggs, et al., 2013. Hybridization and speciation. *Journal*  
223 *of Evolutionary Biology* 26:229–246.
- 224 Chouteau, M., V. Llaurens, F. Piron-Prunier, and M. Joron, 2017. Polymorphism at a  
225 mimicry supergene maintained by opposing frequency-dependent selection pressures. *Pro-*  
226 *ceedings of the National Academy of Sciences* 114:8325–8329.
- 227 Costanzo, K. and A. Monteiro, 2007. The use of chemical and visual cues in female choice in  
228 the butterfly *Bicyclus anynana*. *Proceedings of the Royal Society of London B: Biological*  
229 *Sciences* 274:845–851.
- 230 Coyne, J. A. and H. A. Orr, 1989. Patterns of speciation in *Drosophila*. *Evolution* 43:362–381.

- 231 ———, 2004. Speciation. Sinauer Associates, Sunderland, MA.
- 232 Darragh, K., S. Vanjari, F. Mann, M. F. Gonzalez-Rojas, C. R. Morrison, C. Salazar,  
233 C. Pardo-Diaz, R. M. Merrill, W. O. McMillan, S. Schulz, and C. D. Jiggins, 2017. Male  
234 sex pheromone components in *Heliconius* butterflies released by the androconia affect  
235 female choice. PeerJ 5:e3953.
- 236 Dukas, R. and A. Scott, 2015. Fruit fly courtship: The female perspective. Current Zoology  
237 61:1008–1014.
- 238 Finkbeiner, S. D., D. A. Fishman, D. Osorio, and A. D. Briscoe, 2017. Ultraviolet and yellow  
239 reflectance but not fluorescence is important for visual discrimination of conspecifics by  
240 *Heliconius erato*. Journal of Experimental Biology 220:1267–1276.
- 241 Friberg, M., N. Vongvanich, A.-K. Borg-Karlson, D. J. Kemp, S. Merilaita, and C. Wiklund,  
242 2008. Female mate choice determines reproductive isolation between sympatric butterflies.  
243 Behavioral Ecology and Sociobiology 62:873–886.
- 244 Jennings, J. H., R. R. Snook, and A. Hoikkala, 2014. Reproductive isolation among allopatric  
245 *Drosophila montana* populations. Evolution 68:3095–3108.
- 246 Jiggins, C. D., 2016. The ecology and evolution of *Heliconius* butterflies. Oxford University  
247 Press.
- 248 Jiggins, C. D., R. E. Naisbit, R. L. Coe, and J. Mallet, 2001. Reproductive isolation caused  
249 by colour pattern mimicry. Nature 411:302–305.
- 250 Kemp, D. J., 2007. Female butterflies prefer males bearing bright iridescent ornamentation.  
251 Proceedings of the Royal Society of London B: Biological Sciences 274:1043–1047.
- 252 Kronforst, M. R., M. E. B. Hansen, N. G. Crawford, J. R. Gallant, W. Zhang, R. J. Ku-  
253 lathinal, D. D. Kapan, and S. P. Mullen, 2013. Hybridization reveals the evolving genomic  
254 architecture of speciation. Cell Reports 5:1–12.
- 255 Kronforst, M. R., L. G. Young, L. M. Blume, and L. E. Gilbert, 2006a. Multilocus analyses of  
256 admixture and introgression among hybridizing *Heliconius* butterflies. Evolution 60:1254–  
257 1268.
- 258 Kronforst, M. R., L. G. Young, and L. E. Gilbert, 2007. Reinforcement of mate preference  
259 among hybridizing *Heliconius* butterflies. Journal of Evolutionary Biology 20:278–285.
- 260 Kronforst, M. R., L. G. Young, D. D. Kapan, C. McNeely, R. J. O’Neill, and L. E. Gilbert,  
261 2006b. Linkage of butterfly mate preference and wing color preference cue at the genomic  
262 location of wingless. Proceedings of the National Academy of Sciences of the United States  
263 of America 103:6575–6580.



- 264 McPeck, M. A., L. B. Symes, D. M. Zong, and C. L. McPeck, 2011. Species recognition  
265 and patterns of population variation in the reproductive structures of a damselfly genus.  
266 *Evolution* 65:419–428.
- 267 Merrill, R., K. Dasmahapatra, J. Davey, D. Dell’Aglia, J. Hanly, B. Huber, C. Jiggins,  
268 M. Joron, K. Kozak, V. Llaurens, et al., 2015. The diversification of *Heliconius* butterflies:  
269 what have we learned in 150 years? *Journal of Evolutionary Biology* 28:1417–1438.
- 270 Merrill, R. M., A. Chia, and N. J. Nadeau, 2014. Divergent warning patterns contribute to  
271 assortative mating between incipient *Heliconius* species. *Ecology and Evolution* 4:911–917.
- 272 Merrill, R. M., Z. Gompert, L. M. Dembeck, M. R. Kronforst, W. O. McMillan, and C. D.  
273 Jiggins, 2011a. Mate preference across the speciation continuum in a clade of mimetic  
274 butterflies. *Evolution* 65:1489–500.
- 275 Merrill, R. M., B. V. Schooten, J. A. Scott, and C. D. Jiggins, 2011b. Pervasive genetic associ-  
276 ations between traits causing reproductive isolation in *Heliconius* butterflies. *Proceedings*  
277 *of the Royal Society of London. Series B, Biological Sciences* 278:511–518.
- 278 Merrill, R. M., R. W. Wallbank, V. Bull, P. C. Salazar, J. Mallet, M. Stevens, and C. D.  
279 Jiggins, 2012. Disruptive ecological selection on a mating cue. *Proceedings of the Royal*  
280 *Society of London B: Biological Sciences* 279:4907–4913.
- 281 Morehouse, N. I. and R. L. Rutowski, 2010. In the eyes of the beholders: female choice and  
282 avian predation risk associated with an exaggerated male butterfly color. *The American*  
283 *Naturalist* 176:768–784.
- 284 Naisbit, R. E., C. D. Jiggins, M. Linares, C. Salazar, and J. Mallet, 2002. Hybrid sterility,  
285 Haldane’s rule and speciation in *Heliconius cydno* and *H. melpomene*. *Genetics* 161:1517–  
286 1526.
- 287 Noor, M. A., 1995. Speciation driven by natural selection in *Drosophila*. *Nature* 375:674–675.
- 288 Powell, T. H., D. H. Cha, C. E. Linn, and J. L. Feder, 2012. On the scent of standing  
289 variation for speciation: behavioral evidence for native sympatric host races of *Rhagoletis*  
290 *pomonella* (Diptera: Tephritidae) in the southern United States. *Evolution* 66:2739–2756.
- 291 R Core Team, 2013. R: A language and environment for statistical computing. URL  
292 <http://www.r-project.org/>.
- 293 Ramsey, J., H. Bradshaw, and D. W. Schemske, 2003. Components of reproductive isolation  
294 between the monkeyflowers *Mimulus lewisii* and *M. cardinalis* (Phrymaceae). *Evolution*  
295 57:1520–1534.
- 296 Robertson, K. A. and A. Monteiro, 2005. Female *Bicyclus anynana* butterflies choose males  
297 on the basis of their dorsal UV-reflective eyespot pupils. *Proceedings of the Royal Society*  
298 *of London B: Biological Sciences* 272:1541–1546.

- 299 Rosser, N., A. B. Phillimore, B. Huertas, K. R. Willmott, and J. Mallet, 2012. Testing  
300 historical explanations for gradients in species richness in heliconiine butterflies of tropical  
301 America. *Biological Journal of the Linnean Society* 105:479–497.
- 302 Rutowski, R. L. and P. K. Rajyaguru, 2013. Male-specific iridescent coloration in the pipevine  
303 swallowtail (*Battus philenor*) is used in mate choice by females but not sexual discrimina-  
304 tion by males. *Journal of insect behavior* 26:200–211.
- 305 Schemske, D. W., 2000. Understanding the origin of species. *Evolution* 54:1069–1073.
- 306 Schulz, S., S. Yildizhan, K. Stritzke, C. Estrada, and L. E. Gilbert, 2007. Macrolides from the  
307 scent glands of the tropical butterflies *Heliconius cydno* and *Heliconius pachinus*. *Organic*  
308 *& Biomolecular Chemistry* 5:3434–3441.
- 309 Silberglied, R. E. and O. R. Taylor, 1978. Ultraviolet reflection and its behavioral role in  
310 the courtship of the sulfur butterflies *Colias eurytheme* and *C. philodice* (Lepidoptera,  
311 Pieridae). *Behavioral Ecology and Sociobiology* 3:203–243.
- 312 Wiernasz, D. C. and J. G. Kingsolver, 1992. Wing melanin pattern mediates species recog-  
313 nition in *Pieris occidentalis*. *Animal Behaviour* 43:89–94.
- 314 Wiley, C. and K. L. Shaw, 2010. Multiple genetic linkages between female preference and  
315 male signal in rapidly speciating Hawaiian crickets. *Evolution* 64:2238–2245.

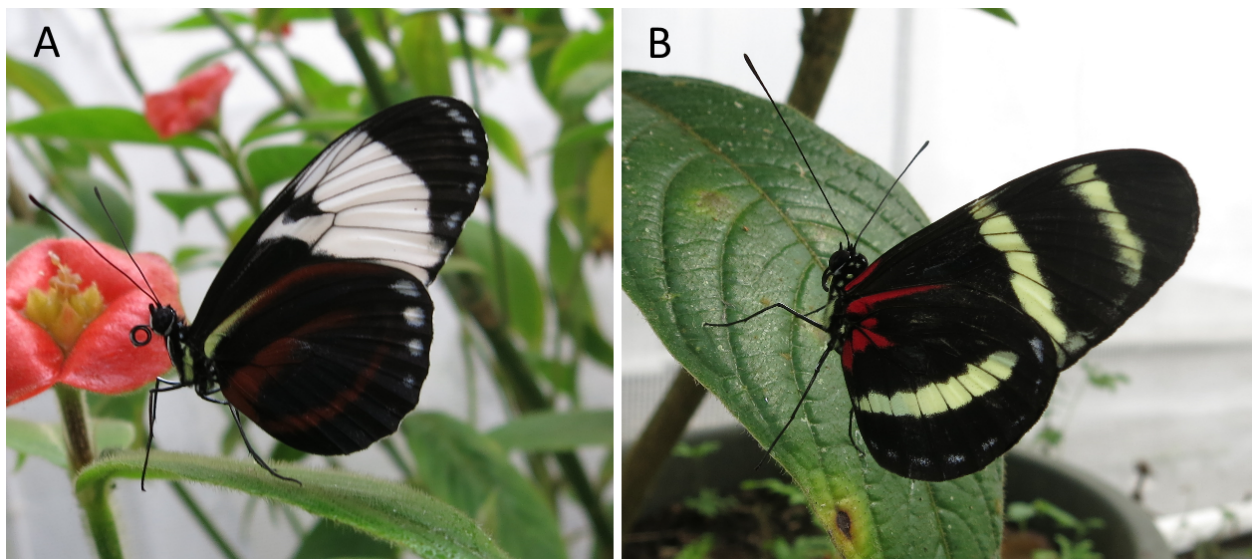

Figure 1: Butterfly species used in this study. A: *Heliconius cydno galanthus*. B: *Heliconius pachinus*.

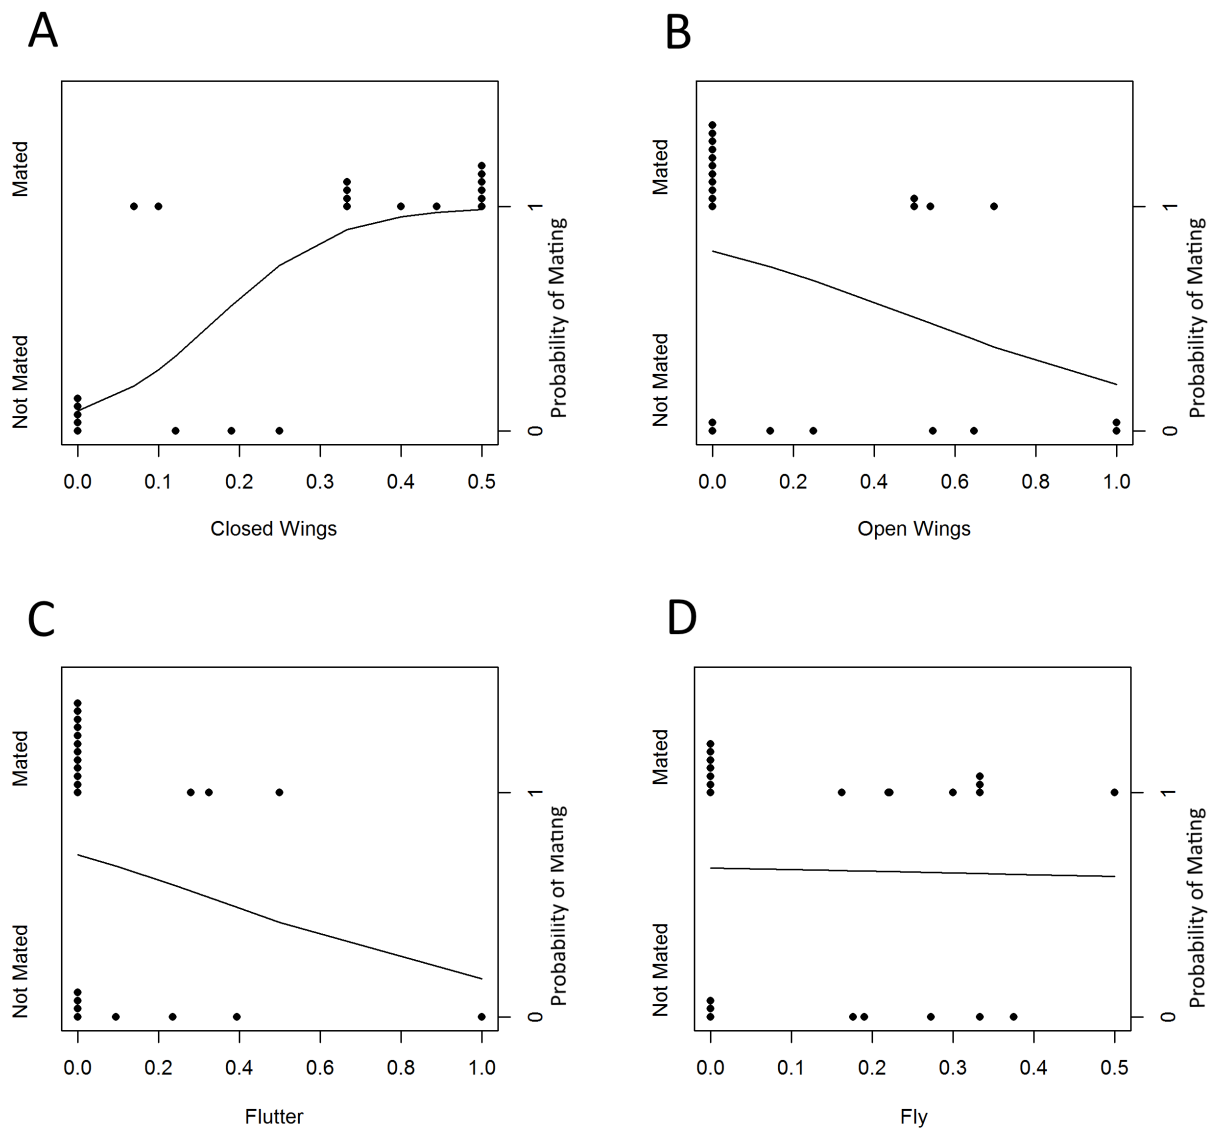

Figure 2: Outcome of no-choice trial and number of female behaviours per male courtship in intraspecific trials. Lines and right y-axis: Probability of mating versus female behaviour from GLMs. A: closed wings. B: open wings. C: flutter. D: fly. See Table 1 for descriptions of behaviours.

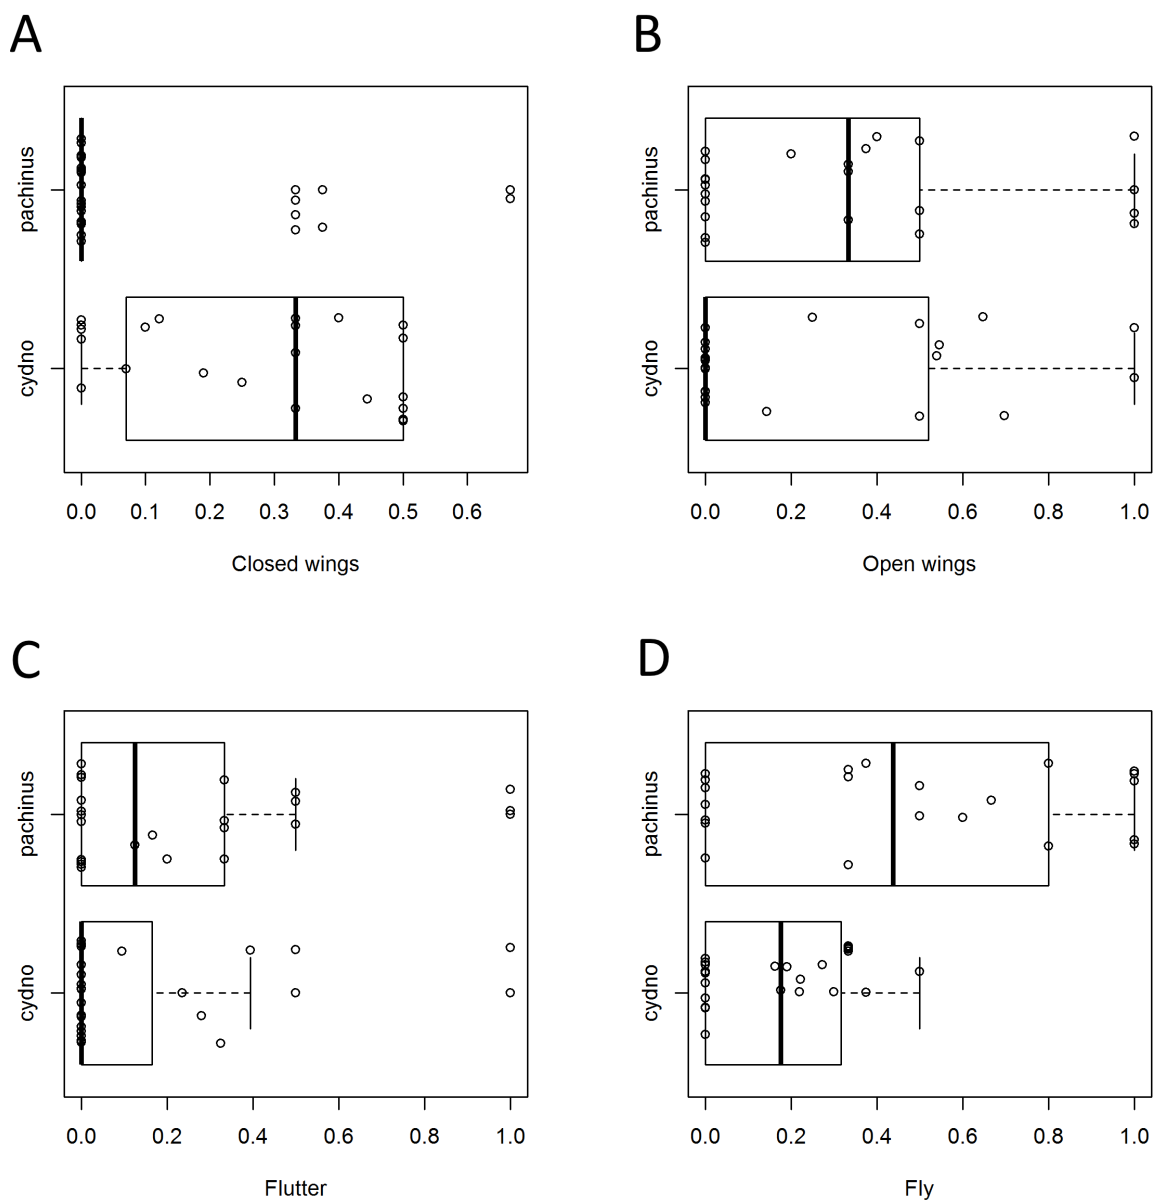

Figure 3: Female behaviour rates in trials with *H. cydno* and *H. pachinus* males. A: closed wings. B: open wings. C: flutter. D: fly. Some sample sizes differ from those in Table 2 because not all behaviours were recorded in a few early trials.
